# Supplementary material for: Bone Marrow Stroma-Induced Transcriptome and Regulome Signatures of Multiple Myeloma
Source: Cancers (Basel). 2022 Feb 13;14(4):927. doi: 10.3390/cancers14040927 (PMC8870223; doi:10.3390/cancers14040927)
Supplement: Supplementary file 1 [file cancers-14-00927-s001.zip › Supplementary Table S3.xlsx]

## Sheet: genes_with_multi_incr_pk
Gene symbol	Peaks (coordinates based on hg38)	Sites number
CD93	chr20:23187757-23188184 (-101631), chr20:23186706-23187299 (-100663), chr20:23180057-23181026 (-94202), chr20:23156226-23156544 (-70045), chr20:23152429-23152706 (-66228), chr20:23149619-23150170 (-63555), chr20:23147910-23148548 (-61889), chr20:23142269-23142900 (-56245), chr20:23116556-23117050 (-30463)	9
FOXO3	chr6:108621177-108621812 (+60629), chr6:108622649-108623491 (+62204), chr6:108627584-108627909 (+66881), chr6:108630186-108630665 (+69560), chr6:108635582-108636276 (+75063), chr6:108648748-108649380 (+88198), chr6:108661449-108661746 (+100732), chr6:108665590-108666107 (+104983), chr6:108746305-108746827 (+185700)	9
TIGD2	chr4:89153070-89153266 (+41668), chr4:89196242-89196676 (+84959), chr4:89222066-89222502 (+110784), chr4:89234935-89235506 (+123721), chr4:89254912-89255250 (+143581), chr4:89256312-89257051 (+145182), chr4:89284796-89285278 (+173537), chr4:89289908-89290436 (+178672), chr4:89293414-89293698 (+182056)	9
ABCG1	chr21:42097933-42098307 (-120998), chr21:42120108-42120621 (-98753), chr21:42174081-42174469 (-44843), chr21:42199179-42199821 (-19618), chr21:42218938-42220673 (+688), chr21:42227885-42228667 (+9158), chr21:42233116-42233883 (+14382), chr21:42291604-42292669 (+73019)	8
SGK1	chr6:134468659-134468951 (-150747), chr6:134437169-134437733 (-119393), chr6:134373395-134373711 (-55495), chr6:134295756-134296493 (+21933), chr6:134249554-134249933 (+68314), chr6:134248303-134248511 (+69651), chr6:134235892-134236505 (+81859), chr6:134167779-134168995 (+149671)	8
SOCS3	chr17:78366308-78366864 (-6509), chr17:78359847-78361014 (-354), chr17:78352851-78353431 (+6936), chr17:78341605-78341900 (+18324), chr17:78317987-78318378 (+41894), chr17:78277959-78278905 (+81645), chr17:78241339-78241843 (+118486)	7
COBLL1	chr2:164920517-164920875 (-78528), chr2:164896750-164897314 (-54864), chr2:164835375-164835613 (+6674), chr2:164826399-164827167 (+15385), chr2:164761170-164761624 (+80771), chr2:164740015-164740310 (+102005)	6
FRMD8	chr11:65426291-65427748 (+40421), chr11:65436030-65436725 (+49779), chr11:65444130-65444740 (+57836), chr11:65445094-65447224 (+59560), chr11:65448403-65449159 (+62182), chr11:65506598-65508515 (+120958)	6
GALM	chr2:38652272-38653053 (-13247), chr2:38653801-38654420 (-11799), chr2:38677477-38678143 (+11900), chr2:38682275-38682977 (+16716), chr2:38741115-38741632 (+75464), chr2:38742351-38743015 (+76773)	6
INAVA	chr1:200878228-200878485 (-16464), chr1:200965665-200966599 (+71311), chr1:200974436-200974880 (+79837), chr1:201007700-201008314 (+113186), chr1:201021010-201021410 (+126389), chr1:201021887-201022229 (+127237)	6
RPL39L	chr3:187098988-187099210 (+40424), chr3:187088786-187089357 (+50451), chr3:187063401-187063825 (+75910), chr3:187044192-187044581 (+95136), chr3:187041747-187042108 (+97595), chr3:186999191-186999728 (+140063)	6
SCYL1	chr11:65426291-65427748 (-98057), chr11:65436030-65436725 (-88699), chr11:65444130-65444740 (-80642), chr11:65445094-65447224 (-78918), chr11:65448403-65449159 (-76296), chr11:65506598-65508515 (-17520)	6
SIK1	chr21:43412380-43412998 (+14439), chr21:43369181-43369543 (+57766), chr21:43355885-43356149 (+71111), chr21:43352578-43353121 (+74278), chr21:43325704-43326667 (+100942), chr21:43312721-43313088 (+114223)	6
ST6GAL1	chr3:186999191-186999728 (+68975), chr3:187041747-187042108 (+111443), chr3:187044192-187044581 (+113902), chr3:187063401-187063825 (+133128), chr3:187088786-187089357 (+158587), chr3:187098988-187099210 (+168614)	6
VEGFA	chr6:43798663-43799354 (+28302), chr6:43804114-43804466 (+33583), chr6:43809425-43809689 (+38850), chr6:43828801-43829012 (+58200), chr6:43838203-43839182 (+67986), chr6:43910740-43910972 (+140149)	6
ABCA1	chr9:105053237-105053472 (-125118), chr9:104961154-104961765 (-33223), chr9:104941444-104941887 (-13429), chr9:104927291-104928402 (+390), chr9:104926498-104927019 (+1478)	5
ARMC2	chr6:108648748-108649380 (-199358), chr6:108661449-108661746 (-186824), chr6:108665590-108666107 (-182573), chr6:108746305-108746827 (-101856), chr6:108883103-108883537 (+34898)	5
BHLHE40	chr3:4898436-4899268 (-80264), chr3:4937106-4937430 (-41848), chr3:4965816-4966531 (-12942), chr3:4984056-4984523 (+5174), chr3:4986595-4987355 (+7859)	5
C10orf10	chr10:44976427-44977254 (+1969), chr10:44975604-44976114 (+2951), chr10:44974830-44975418 (+3686), chr10:44973048-44973442 (+5565), chr10:44964225-44964529 (+14433)	5
CCR1	chr3:46187491-46188255 (+20523), chr3:46110706-46111429 (+97328), chr3:46109167-46109744 (+98940), chr3:46089349-46089629 (+118907), chr3:46085755-46086385 (+122326)	5
DNAH7	chr2:196162575-196163067 (-94009), chr2:196161552-196161896 (-92912), chr2:196151208-196151494 (-82539), chr2:196131294-196133031 (-63351), chr2:196101163-196102068 (-32804)	5
ENSG00000258989	chr14:61525146-61525987 (-3561), chr14:61537386-61537926 (+8528), chr14:61552608-61553388 (+23870), chr14:61594341-61594602 (+65344), chr14:61662434-61662926 (+133552)	5
ETS2	chr21:38787466-38787918 (-17615), chr21:38831377-38832080 (+26422), chr21:38853282-38853892 (+48280), chr21:38906917-38907518 (+101911), chr21:38956752-38957314 (+151726)	5
FAM133B	chr7:92768742-92769314 (-178634), chr7:92763659-92764131 (-173501), chr7:92634899-92635429 (-44770), chr7:92633344-92633862 (-43209), chr7:92584944-92585215 (+5314)	5
FNDC3B	chr3:171966956-171967684 (-73234), chr3:172084979-172085448 (+44660), chr3:172129861-172130167 (+89460), chr3:172179586-172180288 (+139383), chr3:172182031-172182397 (+141660)	5
FOXB2	chr9:76912578-76913065 (-106833), chr9:76913499-76913743 (-106034), chr9:77030093-77030738 (+10761), chr9:77032049-77032374 (+12557), chr9:77063853-77064268 (+44406)	5
KIF21B	chr1:201021887-201022229 (+1642), chr1:201021010-201021410 (+2490), chr1:201007700-201008314 (+15693), chr1:200974436-200974880 (+49042), chr1:200965665-200966599 (+57568)	5
LDHD	chr16:75116485-75117056 (-4), chr16:75110841-75111664 (+5514), chr16:75098603-75099043 (+17944), chr16:75089561-75090180 (+26896), chr16:75011812-75012507 (+104607)	5
LMNB1	chr5:126679654-126680724 (-96959), chr5:126713043-126713329 (-63962), chr5:126762597-126763084 (-14307), chr5:126792074-126792854 (+15316), chr5:126811457-126812160 (+34661)	5
MREG	chr2:216031869-216032510 (-18577), chr2:216017488-216017740 (-4001), chr2:215968147-215969030 (+45024), chr2:215929658-215930283 (+83642), chr2:215918007-215918649 (+95285)	5
MYO5A	chr15:52558195-52558548 (-29322), chr15:52496747-52497213 (+32070), chr15:52440497-52440760 (+88421), chr15:52408837-52409301 (+119981), chr15:52337144-52337670 (+191643)	5
NXT1	chr20:23152429-23152706 (-198168), chr20:23156226-23156544 (-194351), chr20:23180057-23181026 (-170194), chr20:23186706-23187299 (-163733), chr20:23187757-23188184 (-162765)	5
OLFML2B	chr1:162016686-162016916 (+6839), chr1:162010794-162011459 (+12513), chr1:162003643-162004738 (+19449), chr1:161989193-161989597 (+34245), chr1:161849234-161849960 (+174043)	5
RASSF4	chr10:44964225-44964529 (+4585), chr10:44973048-44973442 (+13453), chr10:44974830-44975418 (+15332), chr10:44975604-44976114 (+16067), chr10:44976427-44977254 (+17049)	5
SLC2A12	chr6:134249554-134249933 (-197108), chr6:134248303-134248511 (-195771), chr6:134235892-134236505 (-183563), chr6:134167779-134168995 (-115751), chr6:134035401-134036225 (+16823)	5
STK17B	chr2:196162575-196163067 (+8754), chr2:196161552-196161896 (+9851), chr2:196151208-196151494 (+20224), chr2:196131294-196133031 (+39412), chr2:196101163-196102068 (+69959)	5
TMEM235	chr17:78241339-78241843 (+10281), chr17:78277959-78278905 (+47122), chr17:78317987-78318378 (+86873), chr17:78341605-78341900 (+110443), chr17:78352851-78353431 (+121831)	5
TOX2	chr20:43936447-43937054 (+21887), chr20:43940977-43941200 (+26225), chr20:43955152-43956082 (+40753), chr20:44033418-44033675 (+118683), chr20:44089927-44090438 (+175319)	5
XCR1	chr3:46187491-46188255 (-160131), chr3:46110706-46111429 (-83326), chr3:46109167-46109744 (-81714), chr3:46089349-46089629 (-61747), chr3:46085755-46086385 (-58328)	5
ANKRD10	chr13:111046594-111047159 (-131808), chr13:110965344-110965667 (-50437), chr13:110954957-110955603 (-40211), chr13:110870133-110870715 (+44645)	4
ARAP3	chr5:141838490-141839392 (-156720), chr5:141778094-141778483 (-96068), chr5:141770988-141771544 (-89045), chr5:141658135-141658511 (+23898)	4
ATP8B1	chr18:57930659-57931726 (-199386), chr18:57921686-57922068 (-190070), chr18:57820085-57820272 (-88372), chr18:57748411-57749230 (-17014)	4
BTN3A2	chr6:26304782-26305596 (-60042), chr6:26311623-26311932 (-53453), chr6:26312546-26313648 (-52134), chr6:26321952-26323208 (-42651)	4
CASP8	chr2:201208751-201209288 (-49016), chr2:201220168-201220619 (-37642), chr2:201228129-201228573 (-29685), chr2:201290551-201291424 (+32952)	4
CCNL1	chr3:157162748-157162945 (-2634), chr3:157148118-157148385 (+11961), chr3:157136605-157137847 (+22987), chr3:157128245-157129130 (+31525)	4
CDC42EP3	chr2:37871801-37872257 (-199838), chr2:37652103-37652721 (+19779), chr2:37645374-37646107 (+26450), chr2:37561728-37562046 (+110304)	4
CRYAA	chr21:43312721-43313088 (+143897), chr21:43325704-43326667 (+157178), chr21:43352578-43353121 (+183842), chr21:43355885-43356149 (+187009)	4
DUX4	chr4:190122449-190123104 (-50997), chr4:190177654-190178502 (+4304), chr4:190179121-190180043 (+5808), chr4:190181472-190181742 (+7833)	4
EDEM1	chr3:5194824-5195033 (+7256), chr3:5205336-5205881 (+17936), chr3:5220198-5221922 (+33387), chr3:5298494-5298829 (+110989)	4
ELF3	chr1:202009503-202010951 (+2282), chr1:202023115-202023330 (+15278), chr1:202029293-202029990 (+21697), chr1:202067048-202067672 (+59415)	4
ETFBKMT	chr12:31749074-31749722 (+89710), chr12:31752224-31752717 (+92783), chr12:31756960-31757374 (+97479), chr12:31763140-31763396 (+103580)	4
FAM46C	chr1:117623704-117624211 (+18024), chr1:117630452-117631016 (+24800), chr1:117633475-117634036 (+27822), chr1:117646414-117646645 (+40596)	4
FRG2B	chr10:133763674-133765014 (-137549), chr10:133689115-133690363 (-62944), chr10:133687644-133688526 (-61290), chr10:133658721-133659101 (-32116)	4
GATA5	chr20:62603063-62604407 (-127765), chr20:62501668-62502245 (-25987), chr20:62472245-62473481 (+3107), chr20:62447922-62448667 (+27675)	4
GPR37L1	chr1:202009503-202010951 (-112631), chr1:202023115-202023330 (-99635), chr1:202029293-202029990 (-93216), chr1:202067048-202067672 (-55498)	4
H3F3C	chr12:31763140-31763396 (+28973), chr12:31756960-31757374 (+35074), chr12:31752224-31752717 (+39770), chr12:31749074-31749722 (+42843)	4
HIF1A	chr14:61537386-61537926 (-159966), chr14:61552608-61553388 (-144624), chr14:61594341-61594602 (-103150), chr14:61662434-61662926 (-34942)	4
HIST1H4H	chr6:26321952-26323208 (-37046), chr6:26312546-26313648 (-27563), chr6:26311623-26311932 (-26244), chr6:26304782-26305596 (-19655)	4
IDH2	chr15:90157983-90158666 (-55821), chr15:90086839-90087650 (+15259), chr15:90072869-90073522 (+29308), chr15:90031299-90031852 (+70928)	4
IL1R1	chr2:102063254-102063714 (-79302), chr2:102064005-102064695 (-78436), chr2:102065716-102066174 (-76841), chr2:102082679-102083552 (-59670)	4
IL1R2	chr2:102063254-102063714 (+71640), chr2:102064005-102064695 (+72506), chr2:102065716-102066174 (+74101), chr2:102082679-102083552 (+91272)	4
IRF2	chr4:184421629-184422144 (+52693), chr4:184417975-184418181 (+56502), chr4:184364502-184364909 (+109874), chr4:184344883-184345511 (+129383)	4
KIAA1644	chr22:44351720-44352053 (-39036), chr22:44338567-44339482 (-26174), chr22:44337574-44337876 (-24874), chr22:44309123-44309682 (+3448)	4
KLF13	chr15:31235780-31236815 (-90557), chr15:31352195-31352713 (+25599), chr15:31378391-31378735 (+51708), chr15:31381872-31382830 (+55496)	4
KLF6	chr10:3869163-3869403 (-84008), chr10:3852373-3852732 (-67278), chr10:3810087-3810572 (-25055), chr10:3775800-3776447 (+9151)	4
KLHDC4	chr16:87860785-87861365 (-95126), chr16:87828222-87829156 (-62740), chr16:87806780-87807211 (-41047), chr16:87778931-87779517 (-13275)	4
MSC	chr8:72000299-72001059 (-156211), chr8:71924006-71924364 (-79717), chr8:71919969-71920266 (-75650), chr8:71831212-71831727 (+12998)	4
NEDD4L	chr18:57921686-57922068 (-122501), chr18:57930659-57931726 (-113185), chr18:57943631-57943987 (-100569), chr18:58091093-58091850 (+47094)	4
NFE2L3	chr7:25964451-25964989 (-187520), chr7:26178383-26178964 (+26434), chr7:26187654-26188852 (+36013), chr7:26193986-26195066 (+42286)	4
NSMCE2	chr8:125175209-125175710 (+83607), chr8:125191898-125192135 (+100164), chr8:125219240-125219525 (+127530), chr8:125278323-125278613 (+186615)	4
PDGFB	chr22:39316392-39317012 (-71951), chr22:39310512-39312677 (-66844), chr22:39221115-39221703 (+23342), chr22:39205259-39205908 (+39167)	4
PFDN1	chr5:140321767-140322174 (-18850), chr5:140295424-140295819 (+7499), chr5:140261451-140261990 (+41400), chr5:140221438-140222179 (+81312)	4
PPARG	chr3:12187547-12188394 (-163501), chr3:12193399-12194002 (-157771), chr3:12194579-12194911 (-156727), chr3:12471255-12471769 (+120040)	4
PPP3CA	chr4:101419233-101420031 (-72152), chr4:101418585-101418893 (-71259), chr4:101279370-101279917 (+67836), chr4:101232058-101232670 (+115116)	4
RUNX3	chr1:25030672-25031082 (-65867), chr1:25009497-25010193 (-44835), chr1:24954765-24955603 (+9826), chr1:24947318-24947686 (+17508)	4
SLC38A2	chr12:46549578-46550365 (-177105), chr12:46430384-46430710 (-57680), chr12:46392651-46392968 (-19943), chr12:46356810-46357944 (+15490)	4
SLC7A5	chr16:87860785-87861365 (+8413), chr16:87828222-87829156 (+40799), chr16:87806780-87807211 (+62492), chr16:87778931-87779517 (+90264)	4
SRSF7	chr2:38742351-38743015 (+8811), chr2:38741115-38741632 (+10120), chr2:38682275-38682977 (+68868), chr2:38677477-38678143 (+73684)	4
ST3GAL6	chr3:98690942-98691182 (-41642), chr3:98691937-98692269 (-40601), chr3:98692680-98693239 (-39744), chr3:98744166-98744630 (+11694)	4
STON2	chr14:81478526-81478919 (-51319), chr14:81470015-81471385 (-43296), chr14:81401483-81402678 (+25323), chr14:81303172-81303783 (+123926)	4
TBC1D5	chr3:17605126-17605342 (+94786), chr3:17573244-17573831 (+126482), chr3:17564530-17564943 (+135283), chr3:17563689-17564082 (+136134)	4
TBX19	chr1:168317310-168317797 (+36514), chr1:168321080-168321394 (+40197), chr1:168398979-168399578 (+118239), chr1:168408960-168409284 (+128082)	4
THBS2	chr6:169396068-169396546 (-142263), chr6:169371144-169371816 (-117436), chr6:169241825-169242732 (+11765), chr6:169188119-169188993 (+65488)	4
TNFAIP8	chr5:119274556-119275041 (-58376), chr5:119333270-119333814 (+367), chr5:119338276-119338703 (+5315), chr5:119341740-119342092 (+8741)	4
UMODL1	chr21:42097933-42098307 (+26803), chr21:42120108-42120621 (+49048), chr21:42174081-42174469 (+102958), chr21:42199179-42199821 (+128183)	4
ZNRF1	chr16:75011812-75012507 (+13130), chr16:75089561-75090180 (+90841), chr16:75098603-75099043 (+99793), chr16:75110841-75111664 (+112223)	4
ABTB2	chr11:34371538-34371918 (-13720), chr11:34251047-34251528 (+106720), chr11:34214969-34215298 (+142874)	3
ADAR	chr1:154714147-154715038 (-106387), chr1:154698347-154698920 (-90428), chr1:154681279-154681598 (-73233)	3
ADGRE5	chr19:14353337-14353636 (-27957), chr19:14363655-14363975 (-17629), chr19:14377891-14378322 (-3337)	3
ANAPC16	chr10:72133412-72134029 (-82279), chr10:72174128-72174492 (-41690), chr10:72208554-72209047 (-7199)	3
ARF6	chr14:49879642-49880103 (-13219), chr14:49929928-49930383 (+37064), chr14:50062577-50062933 (+169663)	3
ARHGAP21	chr10:24873193-24873757 (-149807), chr10:24867261-24867519 (-143722), chr10:24652240-24653541 (+70777)	3
ARHGAP27	chr17:45461732-45462295 (-31717), chr17:45329349-45330089 (+100578), chr17:45295895-45296332 (+134183)	3
ARHGEF7	chr13:110954957-110955603 (-159997), chr13:110965344-110965667 (-149771), chr13:111046594-111047159 (-68400)	3
ASAP1	chr8:130527886-130528734 (-84650), chr8:130503069-130503518 (-59634), chr8:130364727-130364916 (+78838)	3
ATF6	chr1:161772090-161773537 (+6520), chr1:161792748-161793095 (+26628), chr1:161849234-161849960 (+83303)	3
ATF7IP	chr12:14220974-14221552 (-163801), chr12:14384928-14385570 (+185), chr12:14394473-14395260 (+9803)	3
ATP9A	chr20:51750211-51750643 (+18207), chr20:51744570-51744870 (+23914), chr20:51661648-51662036 (+106792)	3
BAMBI	chr10:28569678-28570071 (-107467), chr10:28628241-28628826 (-48808), chr10:28735098-28735402 (+57908)	3
BCL2L10	chr15:52139719-52140396 (-27290), chr15:52103605-52103897 (+9017), chr15:52039757-52040770 (+72504)	3
BCL2L11	chr2:111100060-111101151 (-20323), chr2:111168631-111168978 (+47876), chr2:111169214-111169512 (+48434)	3
BCR	chr22:23219571-23220676 (+39914), chr22:23236054-23236363 (+55999), chr22:23251536-23251973 (+71545)	3
BIN1	chr2:127165090-127165906 (-58143), chr2:127067712-127068292 (+39353), chr2:127064484-127065265 (+42480)	3
BMP6	chr6:7842189-7842421 (+115508), chr6:7848089-7848741 (+121618), chr6:7907270-7907736 (+180706)	3
CARMIL1	chr6:25181832-25182303 (-97360), chr6:25366766-25367577 (+87744), chr6:25477274-25477525 (+197972)	3
CASP10	chr2:201208751-201209288 (+26139), chr2:201220168-201220619 (+37513), chr2:201228129-201228573 (+45470)	3
CCDC112	chr5:115379649-115380462 (-83225), chr5:115375859-115376315 (-79256), chr5:115349467-115349819 (-52812)	3
CCDC71L	chr7:106611110-106611671 (+49605), chr7:106604430-106604880 (+56341), chr7:106568733-106569320 (+91969)	3
CCND2	chr12:4294038-4294362 (+20428), chr12:4305565-4306118 (+32070), chr12:4307810-4308314 (+34290)	3
CD44	chr11:35029969-35030585 (-108904), chr11:35030694-35031132 (-108268), chr11:35290980-35291321 (+151970)	3
CDK6	chr7:92768742-92769314 (+64889), chr7:92763659-92764131 (+70022), chr7:92634899-92635429 (+198753)	3
CEP76	chr18:12867672-12868278 (-165201), chr18:12862209-12863026 (-159844), chr18:12839107-12840292 (-136926)	3
CETP	chr16:56938192-56939145 (-23181), chr16:56945140-56945623 (-16468), chr16:56946707-56947572 (-14710)	3
CLLU1	chr12:92408025-92408358 (-15767), chr12:92493781-92494248 (+70056), chr12:92570039-92570611 (+146366)	3
CLMN	chr14:95330630-95330807 (-10813), chr14:95314764-95315038 (+5005), chr14:95313896-95314098 (+5909)	3
COLCA2	chr11:111104233-111104538 (-194169), chr11:111361903-111362192 (+63493), chr11:111376522-111376886 (+78149)	3
CPOX	chr3:98692680-98693239 (-99237), chr3:98691937-98692269 (-98380), chr3:98690942-98691182 (-97339)	3
CREB3L1	chr11:46243133-46243760 (-34214), chr11:46300061-46300599 (+22669), chr11:46309629-46310113 (+32210)	3
CYSLTR2	chr13:48829054-48829832 (+122888), chr13:48884049-48884954 (+177947), chr13:48892368-48892596 (+185927)	3
CYSTM1	chr5:140221438-140222179 (+47167), chr5:140261451-140261990 (+87079), chr5:140295424-140295819 (+120980)	3
CYTIP	chr2:157479425-157480924 (-36033), chr2:157468874-157469717 (-25154), chr2:157420865-157421251 (+23084)	3
DAP	chr5:10801907-10802509 (-40980), chr5:10800794-10801296 (-39817), chr5:10600039-10600228 (+161094)	3
DAPP1	chr4:99723650-99723937 (-93052), chr4:99763507-99764104 (-53040), chr4:99810072-99810326 (-6647)	3
DNAH17	chr17:78727659-78728106 (-150489), chr17:78645677-78646342 (-68616), chr17:78388678-78388966 (+188572)	3
DST	chr6:56938554-56939244 (-86983), chr6:56794311-56794930 (+57295), chr6:56772843-56773254 (+78867)	3
DUSP5	chr10:110422691-110423412 (-74786), chr10:110512274-110513305 (+14952), chr10:110528353-110528737 (+30707)	3
EEF1A1	chr6:73579838-73580866 (-59334), chr6:73515252-73515875 (+5454), chr6:73513847-73514943 (+6623)	3
EGLN3	chr14:34081202-34082106 (-130573), chr14:34043653-34044205 (-92848), chr14:33859987-33860204 (+90985)	3
EHF	chr11:34605999-34606667 (-26131), chr11:34680200-34680508 (+47890), chr11:34809624-34810103 (+177400)	3
ENO1	chr1:8903618-8903924 (-25081), chr1:8899739-8900394 (-21377), chr1:8873643-8873888 (+4924)	3
ENSA	chr1:150613511-150614102 (+15769), chr1:150604808-150605031 (+24656), chr1:150600863-150601224 (+28532)	3
ERN1	chr17:64095521-64096256 (+34236), chr17:64083705-64084723 (+45911), chr17:64061290-64061520 (+68720)	3
ETV5	chr3:186207685-186207945 (-98703), chr3:186162346-186162592 (-53357), chr3:186152402-186153628 (-43903)	3
EXOC3L4	chr14:103100528-103101130 (+685), chr14:103109003-103109235 (+8975), chr14:103110768-103111671 (+11076)	3
FAM120B	chr6:170438294-170438863 (+143258), chr6:170443966-170444521 (+148923), chr6:170459451-170459925 (+164367)	3
FAM46A	chr6:81938190-81938791 (-185783), chr6:81696603-81696816 (+55998), chr6:81560977-81561347 (+191546)	3
FAM49B	chr8:129999869-130000627 (-60416), chr8:129984129-129984682 (-44574), chr8:129973326-129973831 (-33747)	3
FBXO30	chr6:145904876-145905384 (-90377), chr6:145898457-145898781 (-83866), chr6:145865150-145865919 (-50782)	3
FEM1C	chr5:115379649-115380462 (+164838), chr5:115375859-115376315 (+168807), chr5:115349467-115349819 (+195251)	3
FEZF1	chr7:122496185-122496452 (-191814), chr7:122383996-122384200 (-79593), chr7:122204485-122205544 (+99490)	3
FNDC3A	chr13:48829054-48829832 (-147166), chr13:48884049-48884954 (-92107), chr13:48892368-48892596 (-84127)	3
FNIP2	chr4:158805585-158805864 (+36587), chr4:158823400-158823893 (+54509), chr4:158850293-158851027 (+81522)	3
GAB1	chr4:143287375-143287855 (-49147), chr4:143402914-143403664 (+66527), chr4:143404447-143404914 (+67919)	3
GOLM1	chr9:86127191-86127724 (-27900), chr9:86106816-86107334 (-7517), chr9:86096321-86096666 (+3064)	3
GOLPH3	chr5:32283775-32283973 (-109524), chr5:32276385-32276879 (-102282), chr5:32164962-32165722 (+9008)	3
GTF2A1	chr14:81401483-81402678 (-181159), chr14:81303172-81303783 (-82556), chr14:81164219-81164558 (+56533)	3
HERPUD1	chr16:56938192-56939145 (+6621), chr16:56945140-56945623 (+13334), chr16:56946707-56947572 (+15092)	3
HNRNPA2B1	chr7:26193986-26195066 (+6220), chr7:26187654-26188852 (+12493), chr7:26178383-26178964 (+22072)	3
HTRA3	chr4:8255738-8256562 (-13615), chr4:8261810-8262361 (-7679), chr4:8263028-8263545 (-6478)	3
ICAM2	chr17:64095521-64096256 (-75255), chr17:64083705-64084723 (-63580), chr17:64061290-64061520 (-40771)	3
IGF2BP2	chr3:185929791-185930120 (-104944), chr3:185900149-185900563 (-75344), chr3:185807694-185808012 (+17159)	3
IL1RAP	chr3:190562883-190563618 (+49149), chr3:190566435-190566726 (+52479), chr3:190585900-190586996 (+72346)	3
IRF1	chr5:132487917-132488371 (+2654), chr5:132481673-132481964 (+8979), chr5:132426464-132428023 (+63554)	3
ISCA1	chr9:86348514-86348899 (-66178), chr9:86127191-86127724 (+155071), chr9:86106816-86107334 (+175454)	3
KCNN3	chr1:154714147-154715038 (+155685), chr1:154698347-154698920 (+171644), chr1:154681279-154681598 (+188839)	3
KLF14	chr7:130887637-130888304 (-153910), chr7:130855789-130856353 (-122010), chr7:130838840-130839090 (-104904)	3
KLF15	chr3:126364759-126365328 (-7602), chr3:126355754-126357100 (+1015), chr3:126261046-126261384 (+96227)	3
LEF1	chr4:108355411-108356168 (-187368), chr4:108148420-108148635 (+19894), chr4:108118488-108119001 (+49677)	3
LY96	chr8:73985031-73985317 (-6178), chr8:74048400-74049279 (+57488), chr8:74173852-74174303 (+182726)	3
LYPD1	chr2:132824722-132825136 (-154724), chr2:132803608-132804861 (-134030), chr2:132597800-132598250 (+72180)	3
LYZL2	chr10:30736831-30737194 (-107251), chr10:30706704-30707067 (-77124), chr10:30463955-30464481 (+165544)	3
MAP3K14	chr17:45329349-45330089 (-38743), chr17:45295895-45296332 (-5138), chr17:45293428-45293814 (-2645)	3
MCL1	chr1:150613511-150614102 (-34217), chr1:150604808-150605031 (-25330), chr1:150600863-150601224 (-21454)	3
MITF	chr3:69762485-69762968 (+23292), chr3:69764304-69765083 (+25259), chr3:69787270-69788087 (+48244)	3
MYO10	chr5:17024672-17025207 (-88677), chr5:16916589-16916852 (+19542), chr5:16784986-16785597 (+150971)	3
MYO5C	chr15:52440497-52440760 (-144831), chr15:52408837-52409301 (-113271), chr15:52337144-52337670 (-41609)	3
NFKBIA	chr14:35390747-35391504 (+13620), chr14:35365443-35365878 (+39085), chr14:35331583-35331933 (+72988)	3
OGDH	chr7:44617197-44617798 (+10859), chr7:44622674-44623230 (+16313), chr7:44735381-44735868 (+128986)	3
P3H2	chr3:190205812-190206045 (-85000), chr3:190058637-190059483 (+61869), chr3:189958353-189959019 (+162243)	3
PCDH1	chr5:141838490-141839392 (+39469), chr5:141778094-141778483 (+100121), chr5:141770988-141771544 (+107144)	3
PDK1	chr2:172442016-172442336 (-113831), chr2:172578913-172579654 (+23277), chr2:172698176-172698813 (+142488)	3
PFKP	chr10:2949591-2950352 (-117548), chr10:3071545-3071866 (+4186), chr10:3117559-3117917 (+50218)	3
PHACTR4	chr1:28417443-28418091 (-20404), chr1:28500948-28501332 (+62969), chr1:28509949-28511069 (+72338)	3
PHAX	chr5:126679654-126680724 (+79921), chr5:126713043-126713329 (+112918), chr5:126762597-126763084 (+162573)	3
PITRM1	chr10:3313800-3314969 (-141544), chr10:3117559-3117917 (+55103), chr10:3071545-3071866 (+101135)	3
PLK5	chr19:1520041-1520698 (-4589), chr19:1525128-1526037 (+624), chr19:1542619-1542986 (+17844)	3
PRDM1	chr6:105898223-105898738 (-187839), chr6:106146806-106147134 (+60650), chr6:106194937-106195997 (+109147)	3
PSMA6	chr14:35331583-35331933 (+39401), chr14:35365443-35365878 (+73304), chr14:35390747-35391504 (+98769)	3
PSMB1	chr6:170459451-170459925 (+93653), chr6:170443966-170444521 (+109097), chr6:170438294-170438863 (+114762)	3
PTP4A3	chr8:141538998-141539549 (+117886), chr8:141539642-141540952 (+118909), chr8:141541329-141541873 (+120213)	3
PTPN2	chr18:12867672-12868278 (+16260), chr18:12862209-12863026 (+21617), chr18:12839107-12840292 (+44535)	3
PTTG2	chr4:38060760-38061093 (+100492), chr4:38072001-38072180 (+111656), chr4:38128616-38129386 (+168566)	3
QRFPR	chr4:121272563-121273049 (+108253), chr4:121256366-121256785 (+124483), chr4:121253963-121254200 (+126977)	3
RAB33A	chrX:130170744-130171867 (-343), chrX:130173195-130173728 (+1813), chrX:130176261-130176747 (+4855)	3
RAB3GAP2	chr1:220432395-220432801 (-160144), chr1:220326524-220326918 (-54267), chr1:220300442-220301056 (-28295)	3
RPRD1B	chr20:38049814-38050423 (+16573), chr20:38094281-38094611 (+60900), chr20:38123101-38123539 (+89774)	3
RTN4	chr2:55140538-55140862 (-90156), chr2:55133513-55134512 (-83469), chr2:55026245-55026590 (+24126)	3
SEC14L1	chr17:77209298-77209693 (+120747), chr17:77233748-77234346 (+145298), chr17:77235250-77236236 (+146994)	3
SEC61G	chr7:54746322-54746781 (+13422), chr7:54712879-54713104 (+46982), chr7:54704905-54706011 (+54516)	3
SELPLG	chr12:108629790-108630272 (+2047), chr12:108628506-108628806 (+3422), chr12:108605237-108605799 (+26560)	3
2022-09-09	chr17:77209298-77209693 (-71914), chr17:77233748-77234346 (-47363), chr17:77235250-77236236 (-45667)	3
SERPINB1	chr6:2846298-2846837 (-4562), chr6:2843045-2843453 (-1243), chr6:2841402-2842149 (+230)	3
SH3TC1	chr4:8255738-8256562 (+56783), chr4:8261810-8262361 (+62719), chr4:8263028-8263545 (+63920)	3
SHPRH	chr6:145904876-145905384 (+59259), chr6:145898457-145898781 (+65770), chr6:145865150-145865919 (+98854)	3
SIK3	chr11:117078137-117078529 (+20088), chr11:117073721-117074145 (+24488), chr11:117037376-117037851 (+60807)	3
SLC19A1	chr21:45618972-45619515 (-76773), chr21:45592184-45592765 (-50004), chr21:45517618-45518069 (+24627)	3
SLC1A4	chr2:64831301-64832175 (-157663), chr2:64978463-64979335 (-10502), chr2:65049349-65049595 (+60071)	3
SLC22A5	chr5:132426464-132428023 (+57271), chr5:132481673-132481964 (+111846), chr5:132487917-132488371 (+118171)	3
SLC25A15	chr13:40776698-40778026 (-12135), chr13:40813516-40814484 (+24503), chr13:40910408-40910821 (+121118)	3
SLC3A2	chr11:62851161-62852272 (-4394), chr11:62889350-62890484 (+33806), chr11:62891074-62891504 (+35178)	3
SLC9A9	chr3:143849911-143850304 (-1577), chr3:143832106-143832876 (+16040), chr3:143826132-143826607 (+22161)	3
SND1	chr7:127717546-127717803 (+65495), chr7:127782607-127783275 (+130761), chr7:127837953-127838337 (+185965)	3
SPOCK2	chr10:72208554-72209047 (-120028), chr10:72174128-72174492 (-85537), chr10:72133412-72134029 (-44948)	3
SRSF5	chr14:69685039-69685582 (-41589), chr14:69712616-69713757 (-13713), chr14:69716405-69716974 (-10210)	3
STARD7	chr2:96251790-96252182 (-43168), chr2:96245669-96245964 (-36999), chr2:96243944-96244222 (-35265)	3
SUSD6	chr14:69685039-69685582 (+73715), chr14:69712616-69713757 (+101591), chr14:69716405-69716974 (+105094)	3
TDRP	chr8:630809-631381 (-85314), chr8:629900-630467 (-84403), chr8:629311-629701 (-83725)	3
TFF3	chr21:42291604-42292669 (+23514), chr21:42233116-42233883 (+82151), chr21:42227885-42228667 (+87375)	3
TG	chr8:132833582-132834163 (-33088), chr8:132920751-132921044 (+53937), chr8:132978487-132979665 (+112115)	3
TGM2	chr20:38123101-38123539 (+42052), chr20:38094281-38094611 (+70926), chr20:38049814-38050423 (+115253)	3
TIGAR	chr12:4294038-4294362 (-27005), chr12:4305565-4306118 (-15363), chr12:4307810-4308314 (-13143)	3
TIMD4	chr5:157045997-157046522 (-83005), chr5:156927637-156927907 (+35483), chr5:156920521-156921165 (+42412)	3
TIMP4	chr3:12194579-12194911 (-35394), chr3:12193399-12194002 (-34350), chr3:12187547-12188394 (-28620)	3
TMEM119	chr12:108629790-108630272 (-31907), chr12:108628506-108628806 (-30532), chr12:108605237-108605799 (-7394)	3
TMEM127	chr2:96251790-96252182 (+14008), chr2:96245669-96245964 (+20177), chr2:96243944-96244222 (+21911)	3
TMEM53	chr1:44721582-44722332 (-47402), chr1:44712868-44713761 (-38760), chr1:44532036-44532347 (+142363)	3
TNIP3	chr4:121272563-121273049 (-45340), chr4:121256366-121256785 (-29110), chr4:121253963-121254200 (-26616)	3
TPD52	chr8:80146791-80147865 (-66512), chr8:80122144-80123266 (-41889), chr8:80047983-80048292 (+32678)	3
TRIB1	chr8:125278323-125278613 (-151853), chr8:125362558-125363180 (-67452), chr8:125512984-125513516 (+82929)	3
TRIM27	chr6:28958268-28959063 (-34677), chr6:28953020-28953538 (-29290), chr6:28922068-28922365 (+1772)	3
TRIM41	chr5:181221750-181222733 (-1048), chr5:181233696-181235234 (+11175), chr5:181241485-181242026 (+18466)	3
TRPA1	chr8:72000299-72001059 (+74938), chr8:71924006-71924364 (+151432), chr8:71919969-71920266 (+155499)	3
TXNDC5	chr6:7907270-7907736 (+3311), chr6:7848089-7848741 (+62399), chr6:7842189-7842421 (+68509)	3
UBE2K	chr4:39713709-39714367 (+15994), chr4:39812471-39812796 (+114590), chr4:39814812-39815850 (+117287)	3
UNCX	chr7:1171431-1171794 (-61294), chr7:1417557-1417763 (+184753), chr7:1418450-1418982 (+185809)	3
USP14	chr18:10018-10577 (-148310), chr18:107135-108831 (-50625), chr18:109089-111101 (-48513)	3
VOPP1	chr7:55593269-55594345 (-21282), chr7:55573840-55574551 (-1671), chr7:55517211-55517753 (+55043)	3
VPS13A	chr9:77030093-77030738 (-147029), chr9:77032049-77032374 (-145233), chr9:77063853-77064268 (-113384)	3
WIPI1	chr17:68461485-68461970 (-4307), chr17:68437225-68437533 (+20042), chr17:68398748-68399500 (+58297)	3
ZMIZ2	chr7:44617197-44617798 (-131433), chr7:44622674-44623230 (-125979), chr7:44735381-44735868 (-13306)	3
ZNF710	chr15:90031299-90031852 (+30184), chr15:90072869-90073522 (+71804), chr15:90086839-90087650 (+85853)	3
ZNRF2	chr7:30143625-30144243 (-140373), chr7:30225843-30226431 (-58170), chr7:30308431-30308682 (+24250)	3
